# Supplementary material
Source: ML conference proceedings conference paper supplement (https://openreview.net/forum?id=4L3RfWnDzL)
Supplement: supplementary_material [file attachment]

## 1 S1 Training Details and Model Configurations

2 We set the patch size to be 8. Our model is optimized by AdamW optimizer [3] with a learning rate  
3 of 0.0004, 250k training steps, linearly warm-up of 5000 steps and an exponentially weight-decaying  
4 schedule. The gradient norm is clipped at 1. We use Pytorch automatic mixed-precision and data  
5 paralleling for training acceleration. All models are trained on 4 Nvidia RTX A5000 GPUs with a  
6 total batch size of 128. The temperature of cyclic walks is set to 0.1. We use similarity threshold 0.7  
7 and ViT-S8 of DINO [1] for all experiments. We report the mean  $\pm$  standard deviation of 5 runs with  
8 5 random seeds for all our experiments.

9 We list the number of slots and image size used for each dataset in Table S1. For Birds, Cars, Dogs  
10 and Flowers datasets, we report the performance of Slot-Attention, SLATE and BO-QSA from the  
11 work BO-QSA [2]. For other implementation details, we follow all method configurations in the  
12 work DINOSAUR [4].

|                     | Birds | Cars | Dogs | Flowers | Pascal VOC 2012 | COCO 2017 | COCO-Stuff | Movi-C | Movi-E |
|---------------------|-------|------|------|---------|-----------------|-----------|------------|--------|--------|
| Slot-Attention      | -     | -    | -    | -       | 6               | 7         | -          | 11     | 24     |
| SLATE               | -     | -    | -    | -       | 6               | 7         | -          | 11     | 24     |
| DINOSAUR            | 2     | 2    | 2    | 2       | 4               | 7         | -          | 11     | 24     |
| BO-QSA              | -     | -    | -    | -       | 6               | 7         | -          | 11     | 24     |
| Cyclic walks (ours) | 2     | 2    | 2    | 2       | 4               | 11        | 11         | 11     | 24     |
| Image Size          | 128   | 128  | 128  | 128     | 224             | 224       | 224        | 224    | 224    |

Figure S1: The choice of the number of slots and image size for all the methods in each dataset. The '-' indicates that the performance results are directly taken from other papers and thus the configuration is not provided here.

## 13 S2 Inference Steps of Our Method

### 14 S2.1 Unsupervised Foreground Extraction and Unsupervised Object Discovery

15 During the inference, all the models are asked to predict foreground masks in the unsupervised  
16 foreground extraction task and object masks in the unsupervised object discovery task (Section  
17 5.2). We use  $M_{x,\hat{s}}$  (Equation 5) as the segmentation masks, where each feature vector at any spatial  
18 location of  $x$  is softly assigned to a cluster center. The mask with a maximum intersection with the  
19 ground truth masks is viewed as the corresponding predicted masks.

### 20 S2.2 Unsupervised Semantic Segmentation

21 In the task, each pixel of an image has to be classified into one of the pre-defined object categories.  
22 To obtain the category labels for each predicted mask, we perform the following inference steps.  
23 (a) For each image, we obtain a set of object-centric representations  $\hat{s}$ . (b) We compute all the  
24 object features by taking matrix multiplication between  $M_{\hat{s},x}$  and  $x$  from all the images and then  
25 perform k-means clustering on these feature vectors, in which the number of clusters is the number  
26 of semantic categories of the benchmark. (c) A binary matching algorithm is used to match our  
27 clustered categories with the ground truth by maximizing mIoU. (d) Each pixel on a given image can  
28 be assigned to the predicted class label corresponding to the binded slot basis.

## 29 S3 Additional Visualization and Failure Cases

30 We provide additional visualization results of the unsupervised foreground extraction task on the  
31 Birds, Cars, Dogs and Flowers datasets in Figure S2. The same result analysis from Section 5.1 can  
32 be applied here.

33 In the unsupervised object discovery task, we provide additional positive samples of the predicted  
34 object masks in Figure S3 and negative samples in Figure S4. As discussed in Section 5.2, our method  
35 consistently predicts semantic regions despite zero annotated ground truth masks provided during  
36 training.

37 However, we also notice that our method as well as other methods are not perfect in some cases,  
38 especially when the number of slot bases is larger than the number of semantic objects in the scene.

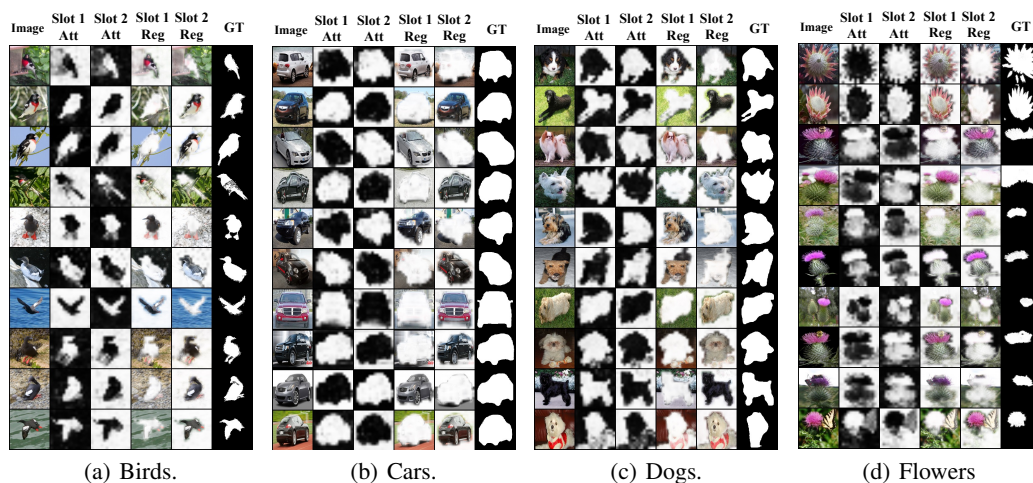

Figure S2: Additional visualization of the predicted foreground masks in the unsupervised foreground extraction task on (a) Birds, (b) Cars, (c) Dogs and (d) Flowers datasets. The design conventions follow Figure 3(a).

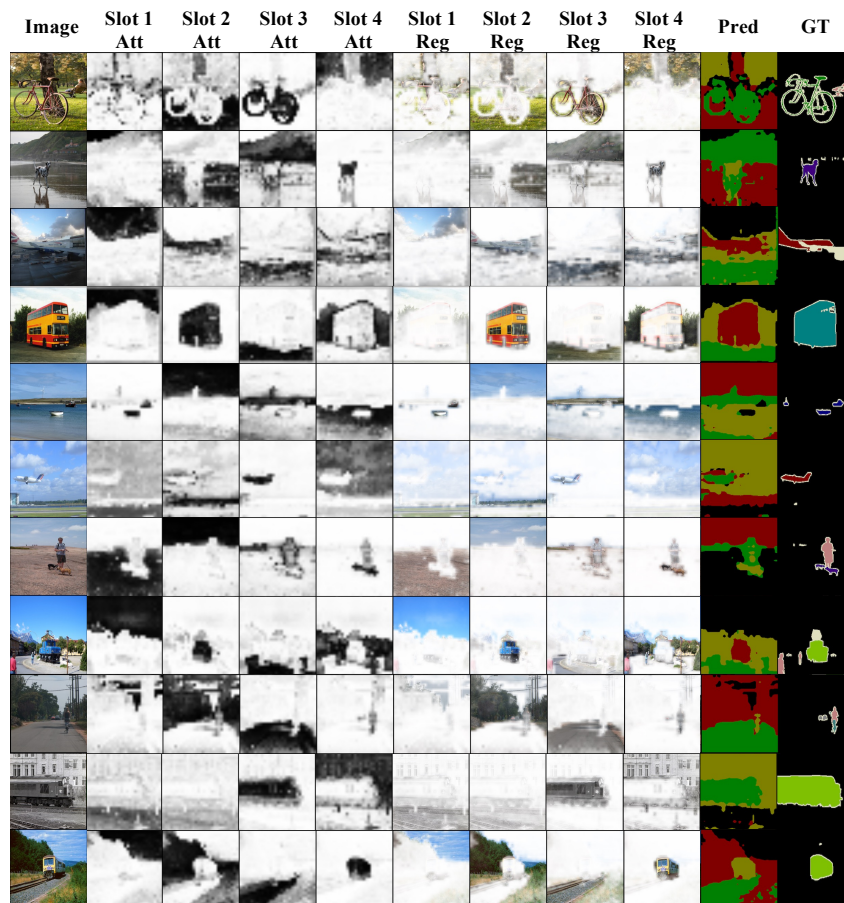

Figure S3: Additional positive samples of the predicted object masks in the unsupervised object discovery task on Pascal VOC 2012. The design conventions follow Figure 3(b).

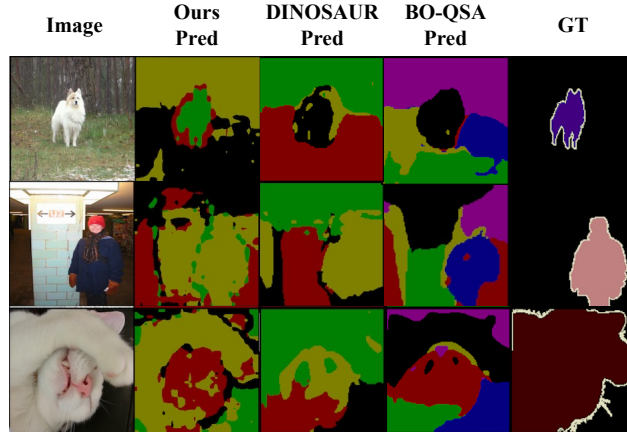

Figure S4: Negative samples of the predicted object masks in the unsupervised object discovery task on Pascal VOC 2012 dataset. From left to right, we show the original image (Col.1), the 4 predicted masks of our cyclic walks corresponding to the 4 slots (Col.2), the 4 masks for DINOSAUR (4 slots, Col.3), the 6 masks for BO-QSA (6 slots, Col.4), and the ground truth object masks (Col.5). Each color indicates a predicted mask from a slot (Col.2-4).

39 For example, in Row 1 of Figure S4, our method correctly segments trees, dog, and grass, but  
 40 incorrectly segments the edges of the dogs. In contrast, other methods output completely random  
 41 segmented masks, carrying no semantic information whatsoever. Given that our method produces  
 42 more “reasonable” negatively segmented masks compared with other methods, this suggests that the  
 43 slot bases trained with our contrastive walks are capable of capturing distinct semantic representations  
 44 and meanwhile, taking into account the holistic view of the scene.

## 45 References

- 46 [1] M. Caron, H. Touvron, I. Misra, H. Jégou, J. Mairal, P. Bojanowski, and A. Joulin. Emerging  
 47 properties in self-supervised vision transformers. In *2021 IEEE/CVF International Conference on*  
 48 *Computer Vision, ICCV 2021, Montreal, QC, Canada, October 10-17, 2021*, pages 9630–9640.  
 49 IEEE, 2021.
- 50 [2] B. Jia, Y. Liu, and S. Huang. Unsupervised object-centric learning with bi-level optimized query  
 51 slot attention. *CoRR*, abs/2210.08990, 2022.
- 52 [3] I. Loshchilov and F. Hutter. Fixing weight decay regularization in adam. *CoRR*, abs/1711.05101,  
 53 2017.
- 54 [4] M. Seitzer, M. Horn, A. Zadaianchuk, D. Zietlow, T. Xiao, C. Simon-Gabriel, T. He, Z. Zhang,  
 55 B. Schölkopf, T. Brox, and F. Locatello. Bridging the gap to real-world object-centric learning.  
 56 *CoRR*, abs/2209.14860, 2022.
